# Supplementary material for: Three-dimensional bipedal DNA walker enabled logic gates responding to telomerase and miRNA
Source: Royal Society of Chemistry journal article supplement (doi:10.1039/d0cc08089f), 2021-01-01
Supplement: d0cc08089f1.pdf [file d0cc08089f1.pdf]

## Supporting Information

### **Three-dimensional bipedal DNA walker enabled logic gates responding to telomerase and miRNA**

Xin Liu,<sup>a</sup> Fanyu Meng,<sup>b</sup> Rui Sun,<sup>c</sup> Kangnan Wang,<sup>a</sup> Zhiqiang Yu,<sup>\*ac</sup> Peng Miao<sup>\*bd</sup>

<sup>a</sup>. Department of Pharmacy, Shunde Hospital, Southern Medical University (The First People's Hospital of Shunde, Foshan), Foshan 528300, China.

<sup>b</sup>. Ji Hua Laboratory, Foshan 528200, China.

<sup>c</sup>. Guangdong Provincial Key Laboratory of New Drug Screening, School of Pharmaceutical Sciences, Southern Medical University, Guangzhou 510515, China.

<sup>d</sup>. Suzhou Institute of Biomedical Engineering and Technology, Chinese Academy of Sciences, Suzhou 215163, China.

E-mail: yuzq@smu.edu.cn (Z. Q. Yu); miaopeng@sibet.ac.cn (P. Miao)

## Experimental

### Materials and chemicals

Trisodium citrate, manganese (II) chloride ( $\text{MnCl}_2$ ), gold (III) chloride trihydrate ( $\text{HAuCl}_4 \cdot 3\text{H}_2\text{O}$ ), tris(2-carboxyethyl)phosphine hydrochloride (TCEP), 3-[(3-Cholamidopropyl)-dimethylammonio]-1-propanesulfonic acid (CHAPS), tetramethylammonium hydroxide, phenylmethanesulfonyl fluoride (PMSF), diethylpyrocarbonate (DEPC), and ethylene glycol bis(2-aminoethyl ether)-*N,N,N',N'*-tetraacetic Acid (EGTA) were ordered from Sigma (USA). 3'-Azido-3'-deoxythymidine (AZT) was obtained from Aladdin Biological Technology Co., Ltd. (Shanghai, China). Deoxynucleotide triphosphates (dNTPs) were purchased from New England Biolabs Ltd. (Beijing, China). HeLa cells were from the Institute of Biochemistry and Cell Biology, Chinese Academy of Sciences (Shanghai, China). Fetal bovine serum (FBS) was purchased from Hangzhou Sijiqing Biological Engineering Material Co., Ltd. (Hangzhou, China). All oligonucleotides and were synthesized and purified by Sangon Biotechnology Co. Ltd. (Shanghai, China). The sequences were listed in Table S1.

### Preparation of AuNPs

Bare AuNPs were prepared by sodium citrate reduction of  $\text{HAuCl}_4$ .<sup>1</sup> Briefly, 100 mL of  $\text{HAuCl}_4$  solution was firstly prepared with the concentration of 0.01% (w/v). Then, it was boiled. 10 mL of sodium citrate with the concentration of 38.8 mM was spiked rapidly. The resulted solution was stirred with the reflux condenser. After reacting for 0.5 h, the heat was removed and the solution was slowly cooled to room

temperature. The AuNPs were then centrifuged at 12000 rpm for 30 min and resuspended in pure water.

All DNA probes are firstly prepared in the 10 mM phosphate buffered saline (pH 7.4) containing 10 mM TCEP. For AND gate, 100  $\mu$ L of Probe S1 (30  $\mu$ M) was mixed with 900  $\mu$ L of AuNPs. After 16 h incubation, the nanoconjugates were “aged” in 10 mM phosphate (pH 7.0) containing 0.1 M NaCl for 24 h. Probe L1 and L2 were added in the S1 modified AuNPs with the final concentration of 3  $\mu$ M for 2 h. Afterward, Excess reagents were removed by centrifuging at 12000 rpm for 0.5 h. For OR gate, Probe S2 modified AuNPs were achieved with the same manner and Probe L3 (3  $\mu$ M) was added in the nanoconjugates for the hybridization.

### **Preparation of MnO<sub>2</sub> nanosheets**

MnO<sub>2</sub> nanosheets were prepared according to a previous report.<sup>2</sup> Briefly, the solution of tetramethylammonium hydroxide and H<sub>2</sub>O<sub>2</sub> was prepared with the concentrations of 0.6 M and 3%, respectively. 20 mL of the above solution was mixed with 10 mL of MnCl<sub>2</sub> with the concentration of 0.3 M. The solution then turned to dark brown, which was further stirred overnight. To purify the obtained nanosheets, the bulk MnO<sub>2</sub> was centrifuged at 2000 rpm for 10 min and further washed by pure water and methanol, respectively. Next, 5 mg of dried MnO<sub>2</sub> nanosheets was dispersed in 20 mL of pure water, followed by ultrasonication for 10 h. Further, 20  $\mu$ L of MnO<sub>2</sub> nanosheets was mixed with 5  $\mu$ L of TP (50  $\mu$ M), 2  $\mu$ L of W1 (50  $\mu$ M) and 2  $\mu$ L of W2 (50  $\mu$ M) to form the DNA-MnO<sub>2</sub> nanocomposites.

### **Telomerase extraction**

HeLa cells were cultured in DMEM containing 10% FBS at 37 °C in an atmosphere of 5% CO<sub>2</sub>. 10<sup>6</sup> cells were firstly collected and resuspended in 200 µL of ice cold 0.5% (w/v) CHAPS lysis buffer (pH 7.5) containing 10 mM Tris-HCl, 1 mM MgCl<sub>2</sub>, 1 mM EGTA, 0.1 mM PMSF and 10% (v/v) glycerol. After incubating on ice for 30 min, the solution was pipetted for several times to thoroughly lyse the cells. The extract was then separated by centrifuging at 4 °C (12000 rpm for 30 min). The supernatant was collected and transferred into a fresh RNase-free tube. Next, the extracted telomerase was ready for assay or stored frozen at −80°C.

### **Bipedal DNA walking for logic gate construction**

The samples were mixed with Probe TP (2 µM), W1 (2 µM) and W2 (2 µM). The solution was incubated at 37°C for 2 h, which was used as logic inputs. 10 µL of the above solution was blended with 100 µL of DNA-AuNPs nanocomposites (AND and OR gates) containing Mn<sup>2+</sup> (2 µM) for 40 min. Afterward, fluorescence emission spectra were recorded (excited at 494 nm). To check the selectivity of the DNAzyme, a series of other metal ions (Mg<sup>2+</sup>, Zn<sup>2+</sup>, Ca<sup>2+</sup>, Ba<sup>2+</sup>, Cu<sup>2+</sup>, Pb<sup>2+</sup>) with the concentrations of 2 µM were used to replace Mn<sup>2+</sup>. Then, the obtained fluorescece spectra were compared.

### **Intracellular imaging**

10<sup>6</sup> cells was firstly seeded in a confocal dish for 24 h. Then, 10 µL of DNA-AuNPs nanocomposites and 20 µL of DNA-MnO<sub>2</sub> nanocomposites were added. The cells were

incubated for another 6 h. Subsequently, the cells were washed with PBS for three times and observed under confocal microscope. For telomerase inhibition investigation, AZT was previously interacted with the cells for 24 h before further logic operations.

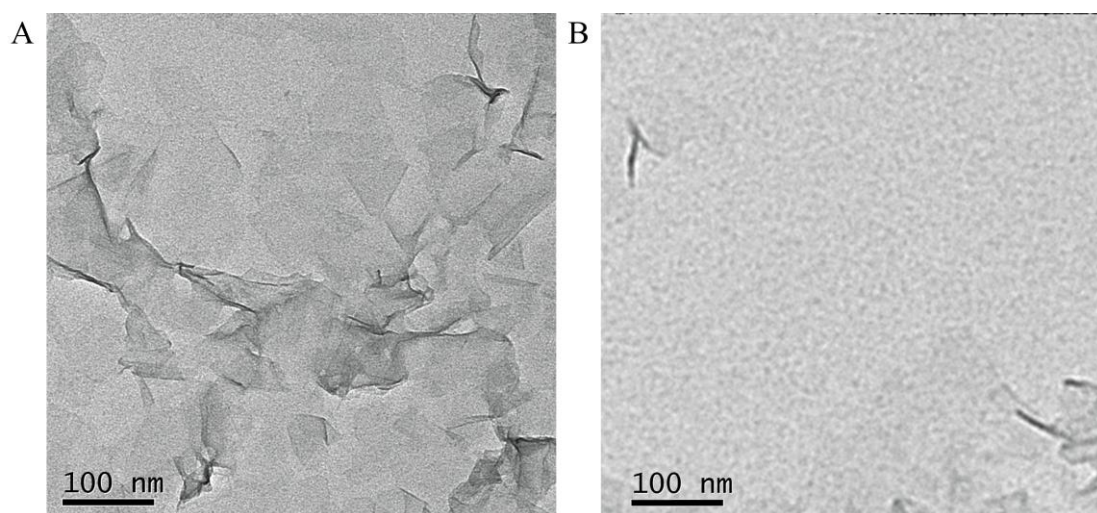

**Figure S1.** TEM images of MnO<sub>2</sub> nanosheets in the (A) absence and (B) presence of GSH.

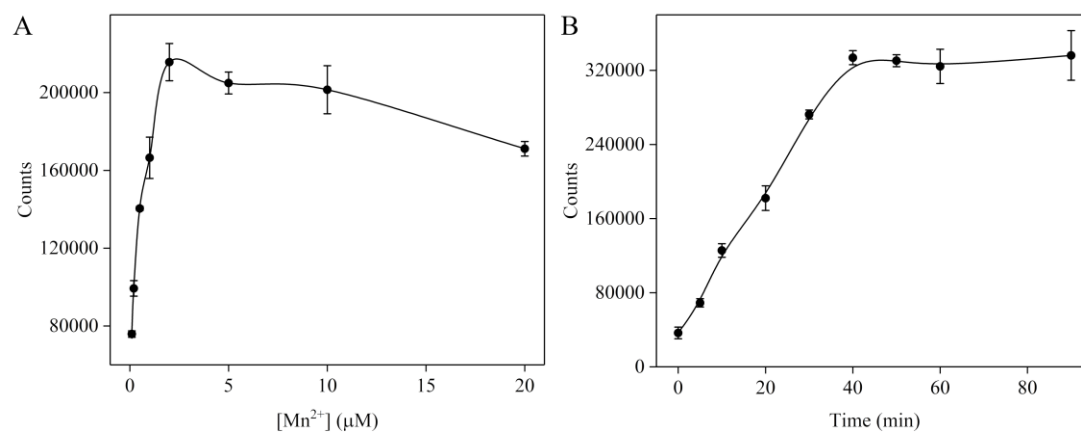

**Figure S2.** Optimizations of (A) Mn<sup>2+</sup> concentration and (B) reaction time based on AND gate.

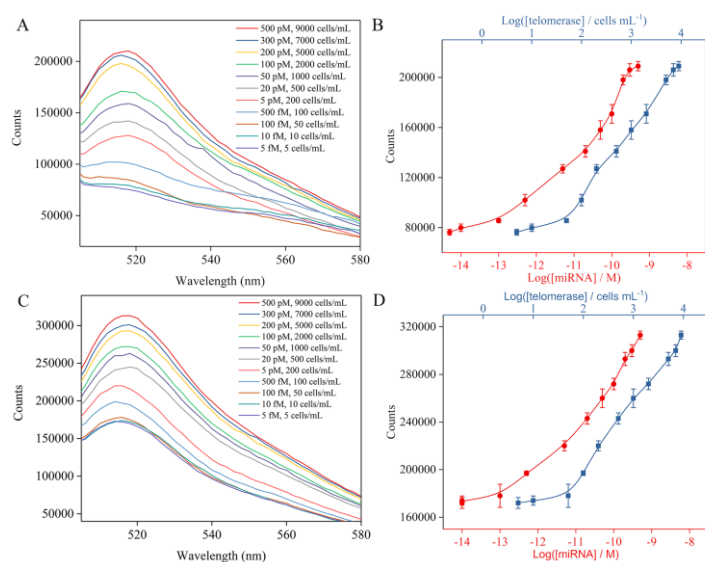

**Figure S3.** Fluorescence emission spectra of (A) AND gate and (C) OR gate for the measurements of different concentrations of target miRNA and telomerase. (B) and (D) are corresponding calibration curves. The concentration of DNzyme is 2  $\mu\text{M}$ . The concentrations of S1 and S2 are 3  $\mu\text{M}$ .

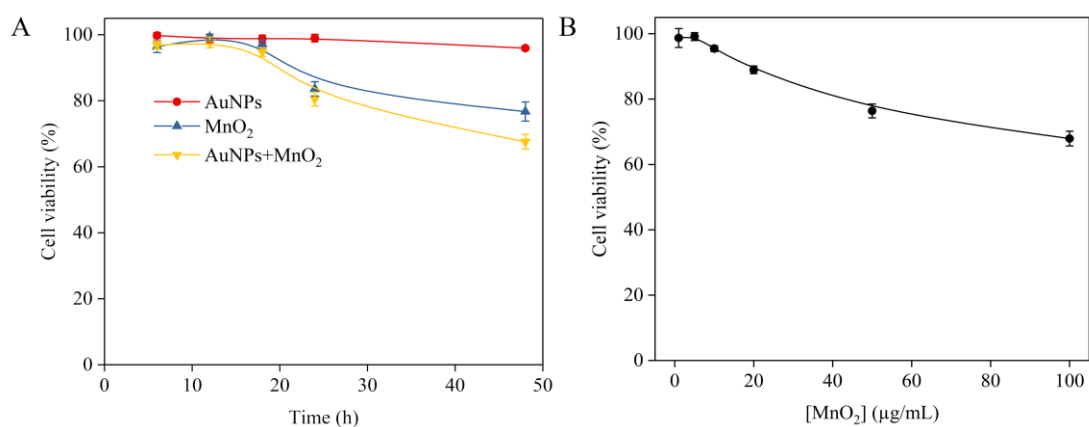

**Figure S4.** (A) Cell viability after treated with AuNPs,  $\text{MnO}_2$  nanosheets and the mixture with different time durations. (B) Cell viability after treated with  $\text{MnO}_2$  nanosheets with different concentrations.

**Table S1.** DNA and RNA sequences used in this work.

| Name    | Sequence (from 5' to 3')                                                                      |
|---------|-----------------------------------------------------------------------------------------------|
| W1      | AACCCCTATCACGATTAGCATTAATAATCGTCTTAATGCTA<br>ATCGTGCTCCGAGCCGGTCGAAACCCTAACGGG                |
| W2      | CATTAAGACGATTAGTTAATGCTAATCGTGATAGGGGTATTA<br>ACTAATCGTGCTCCGAGCCGGTCGAAACCCTAACGGG           |
| miR-155 | UUA AUGCUAAUCGUGAUAGGGGUU                                                                     |
| miR-21  | UAGCUUAUCAGACUGAUGUUGA                                                                        |
| TP      | AATCCGTCGAGCAGAGTT                                                                            |
| L1      | AACTAATCGTGTTT                                                                                |
| L2      | CCCTAACCTAACCTAAA ACTCT                                                                       |
| L3      | FAM-CCCTAACCTAAA ACTCT                                                                        |
| S1      | SH-(CH <sub>2</sub> ) <sub>6</sub> -CCCGTTTTACCCGTTAGGGT/rA/GGCACGATTAGTT-<br>FAM             |
| S2      | SH-(CH <sub>2</sub> ) <sub>6</sub> -<br>CCCGTTTTAGGGCCCCGTGCCCGTTAGGGT/rA/GGCACGATTA<br>G-FAM |

## References

- 1 P. Miao, Y. Tang, B. Wang, C. Jiang, L. Gao, B. Bo, J. Wang, *Electrochim. Acta.*, 2016, **190**, 396-401.
- 2 P. Miao, Y. Tang, *Anal. Chem.*, 2020, **92**, 12700-12709.
